# Supplementary material
Source: publisher site journal article supplement (https://www.dovepress.com/get_supplementary_file.php?f=230072.xlsx)
Supplement: Supplementary file 1 [file get_supplementary_file.php]

## Sheet: Supplementary Table 1
Table S1 Sample characteristics, by data completion, January 2013 – December 2013
	patients readmitted within 30 days
	complete data									incomplete data
	COPD									COPD
comorbidities	0		1		2 to 3		4 or more			0		1		2 to 3		4 or more
	N	%	N	%	N	%	N	%		N	%	N	%	N	%	N	%
All	824	100	1840	100	4609	100	2714	100		3573	100	9145	100	24130	100	15540	100
Individual level
Gender
male	407	49.39	846	45.98	2054	44.56	1150	42.37		1630	45.62	4147	45.35	10635	44.07	6614	42.56
female	417	50.61	994	54.02	2555	55.44	1564	57.63		1943	54.38	4998	54.65	13495	55.93	8926	57.44
Age (in years)	65.77	11.55	67.83	11.42	69.33	11.41	71	11.61		64.98	12.12	68.21	12.07	70.88	12.04	73.24	11.81
Race
white	722	87.62	1542	83.8	3681	79.87	2120	78.11		3003	84.05	7530	82.34	19473	80.7	12211	78.58
black	32	3.88	139	7.55	452	9.81	313	11.53		185	5.18	671	7.34	2067	8.57	1471	9.47
Hispanic	47	5.7	110	5.98	343	7.44	203	7.48		234	6.55	622	6.8	1762	7.3	1319	8.49
other	23	2.79	49	2.66	133	2.89	78	2.87		151	4.23	322	3.52	828	3.43	539	3.47
Insurance types
Public	621	75.36	1506	81.85	4044	87.74	2469	90.97		2314	64.76	6950	76	20181	83.63	13910	89.51
Private	203	24.64	334	18.15	565	12.26	245	9.03		1259	35.24	2195	24	3949	16.37	1630	10.49
Hospital level
Length of stay	3.78	2.57	4.02	3.72	4.59	3.99	5.27	4.34		3.31	2.91	3.8	4.51	4.47	4.67	5.26	4.73
Bed size
6-199 beds	320	38.83	650	35.33	1412	30.64	744	27.41		1294	36.22	2989	32.68	7414	30.73	4341	27.93
200-349 beds	270	32.77	636	34.57	1762	38.23	1063	39.17		1235	34.56	3427	37.47	9090	37.67	6133	39.47
500 or more beds	234	28.4	554	30.11	1435	31.13	907	33.42		1044	29.22	2729	29.84	7626	31.6	5066	32.6
Teaching hospital
yes	137	16.63	345	18.75	932	20.22	615	22.66		605	16.93	1688	18.46	4805	19.91	3306	21.27
no	687	83.37	1495	81.25	3677	79.78	2099	77.34		2968	83.07	7457	81.54	19325	80.09	12234	78.73
Residency training approval hospital
yes	305	37.01	720	39.13	1945	42.2	1230	45.32		1375	38.48	3656	39.98	10187	42.22	6789	43.69
no	519	62.99	1120	60.87	2664	57.8	1484	54.68		2198	61.52	5489	60.02	13943	57.78	8751	56.31
Rural hospital
yes	707	85.8	1606	87.28	4108	89.13	2463	90.75		3150	88.16	8065	88.19	21475	89	13865	89.22
no	117	14.2	234	12.72	501	10.87	251	9.25		423	11.84	1080	11.81	2655	11	1675	10.78
Having basic health IT
No	8	0.97	22	1.2	38	0.82	25	0.92		41	1.15	108	1.18	218	0.9	94	0.6
Partially	329	39.93	743	40.38	1858	40.31	1100	40.53		1347	37.7	3540	38.71	9592	39.75	6325	40.7
Fully	487	59.1	1075	58.42	2713	58.86	1589	58.55		2185	61.15	5497	60.11	14320	59.35	9121	58.69
ACO types
pioneer
no	785	95.27	1738	94.46	4326	93.86	2512	92.56		3411	95.47	8644	94.52	22665	93.93	14537	93.55
yes	39	4.73	102	5.54	283	6.14	202	7.44		162	4.53	501	5.48	1465	6.07	1003	6.45
MSSP
no	715	86.77	1522	82.72	3740	81.15	2169	79.92		2965	82.98	7633	83.47	19610	81.27	12526	80.6
yes	109	13.23	318	17.28	869	18.85	545	20.08		608	17.02	1512	16.53	4520	18.73	3014	19.4
Geographic level
Median Income
1st	259	31.43	583	31.68	1486	32.24	909	33.49		1034	28.94	2610	28.54	7177	29.74	4662	30
2nd	224	27.18	517	28.1	1316	28.55	743	27.38		1024	28.66	2558	27.97	6732	27.9	4328	27.85
3rd	219	26.58	444	24.13	1060	23	620	22.84		844	23.62	2283	24.96	5682	23.55	3655	23.52
4th	122	14.81	296	16.09	747	16.21	442	16.29		671	18.78	1694	18.52	4539	18.81	2895	18.63
HHI	0.51	0.29	0.48	0.28	0.47	0.27	0.44	0.26		0.49	0.28	0.48	0.27	0.46	0.26	0.45	0.25
Notes: ACO, accountable care organization; MSSP, Medicare shared savings program; HHI, Herfindahl-Hirschman Index

## Sheet: Supplementary Table 2
Table S2 Sample characteristics, by inclusion criteria, January 2013 – December 2013 (cont.)
	patients readmitted because of COPD
	Complete data								Died in hospital and not readmitted within 30 days
	COPD									COPD
Comorbidities	0				2 to 3		4 or more		0		1		2 to 3		4 or more
	N	%	N	%	N	%	N	%	N	%	N	%	N	%	N	%
All	824	100	1840	100	4609	100	2714	100	3573	100	9145	100	24130	100	15540	100
Individual level
Gender
male	407	49	846	46	2054	45	1150	42	1630	46	4147	45	10635	44	6614	43
female	417	51	994	54	2555	55	1564	58	1943	54	4998	55	13495	56	8926	57
Age (in year)	65.77	11.55	67.83	11.42	69.33	11.41	71	11.61	64.98	12.12	68.21	12.07	70.88	12.04	73.24	11.81
Race
white	722	88	1542	84	3681	80	2120	78	3003	84	7530	82	19473	81	12211	79
black	32	4	139	8	452	10	313	12	185	5	671	7	2067	9	1471	9
Hispanic	47	6	110	6	343	7	203	7	234	7	622	7	1762	7	1319	8
other	23	3	49	3	133	3	78	3	151	4	322	4	828	3	539	3
Insurance types
Public	621	75	1506	82	4044	88	2469	91	2314	65	6950	76	20181	84	13910	90
Private	203	25	334	18	565	12	245	9	1259	35	2195	24	3949	16	1630	10
Hospital level
Length of stay	3.78	2.57	4.02	3.72	4.59	3.99	5.27	4.34	3.31	2.91	3.8	4.51	4.47	4.67	5.26	4.73
Bed size
6-199 beds	320	39	650	35	1412	31	744	27	1294	36	2989	33	7414	31	4341	28
200-349 beds	270	33	636	35	1762	38	1063	39	1235	35	3427	37	9090	38	6133	39
500 or more beds	234	28	554	30	1435	31	907	33	1044	29	2729	30	7626	32	5066	33
Teaching hospital
yes	137	17	345	19	932	20	615	23	605	17	1688	18	4805	20	3306	21
no	687	83	1495	81	3677	80	2099	77	2968	83	7457	82	19325	80	12234	79
Residency training approval hospital
yes	305	37	720	39	1945	42	1230	45	1375	38	3656	40	10187	42	6789	44
no	519	63	1120	61	2664	58	1484	55	2198	62	5489	60	13943	58	8751	56
Rural hospital
yes	707	86	1606	87	4108	89	2463	91	3150	88	8065	88	21475	89	13865	89
no	117	14	234	13	501	11	251	9	423	12	1080	12	2655	11	1675	11
Having basic health IT
No	8	1	22	1	38	1	25	1	41	1	108	1	218	1	94	1
Partially	329	40	743	40	1858	40	1100	41	1347	38	3540	39	9592	40	6325	41
Fully	487	59	1075	58	2713	59	1589	59	2185	61	5497	60	14320	59	9121	59
ACO types
pioneer
no	785	95	1738	94	4326	94	2512	93	3411	95	8644	95	22665	94	14537	94
yes	39	5	102	6	283	6	202	7	162	5	501	5	1465	6	1003	6
MSSP
no	715	87	1522	83	3740	81	2169	80	2965	83	7633	83	19610	81	12526	81
yes	109	13	318	17	869	19	545	20	608	17	1512	17	4520	19	3014	19
Geographic level
Median Income
1st	259	31	583	32	1486	32	909	33	1034	29	2610	29	7177	30	4662	30
2nd	224	27	517	28	1316	29	743	27	1024	29	2558	28	6732	28	4328	28
3rd	219	27	444	24	1060	23	620	23	844	24	2283	25	5682	24	3655	24
4th	122	15	296	16	747	16	442	16	671	19	1694	19	4539	19	2895	19
HHI	0.51	0.29	0.48	0.28	0.47	0.27	0.44	0.26	0.49	0.28	0.48	0.27	0.46	0.26	0.45	0.25
Notes: ACO, accountable care organization; MSSP, Medicare shared savings program; HHI, Herfindahl-Hirschman Index

## Sheet: Supplementary Table 3
Table S3 The impact of sample selection on risks of 30-day readmission, hackman selection model approach
	outcome model	selection model	Rho
	𝛽	𝛽
Individual level
COPD
COPD + 1	-0.0901	-0.0590**
	(0.0642)	(0.0264)
COPD + 2 – 3	-0.0562	-0.0623***
	(0.0561)	(0.0242)
COPD + 4 and more	-0.0581	-0.0780***
	(0.0613)	(0.0256)
Gender
Female	-0.0535*	-0.0143
	(0.0284)	(0.0125)
Age (in year)	0.00400*	-0.00769***
	(0.00238)	(0.000562)
Race
Black	-0.106**	0.0277
	(0.0450)	(0.0231)
Hispanic	-0.00683	-0.0265
	(0.0499)	(0.0251)
Other	0.0196	-0.104***
	(0.0818)	(0.0371)
Insurance types
Private	0.0928	-0.242***
	(0.0844)	(0.0185)
Hospital level
Bed size
200-349 beds	0.0119	-0.0195
	(0.0318)	(0.0165)
500 or more beds	0.0200	-0.0186
	(0.0423)	(0.0221)
Teaching hospital
No	0.0188	0.0108
	(0.0344)	(0.0173)
Residency training approval hospital
No	-0.0304	-0.0261
	(0.0423)	(0.0204)
Having basic health IT
Partially	0.101	-0.0678
	(0.125)	(0.0673)
Fully	0.0934	-0.0805
	(0.126)	(0.0673)
Rural hospital
Yes	0.0557	-0.0206
	(0.0403)	(0.0214)
ACO types
Having MSSP	-0.00870	-0.0273
	(0.0368)	(0.0182)
Having pioneer	-0.0893	-0.0278
	(0.0626)	(0.0291)
Geographic level
Median Income
2nd	0.0219	-0.0395**
	(0.0328)	(0.0165)
3rd	-0.0217	-0.0497***
	(0.0403)	(0.0173)
4th	-0.0223	-0.108***
	(0.0602)	(0.0195)
HHI	0.0769	-0.0541*
	(0.0567)	(0.0296)
State
FL	0.0870*	-0.0684***
	(0.0479)	(0.0245)
IA	0.375***	0.0507
	(0.110)	(0.0314)
MA	0.0185	0.0454
	(0.0613)	(0.0302)
NY	0.0787*	-0.0403
	(0.0475)	(0.0248)
UT	-0.218	-0.379**
	(0.436)	(0.158)
WA	0.234***	-0.178***
	(0.0802)	(0.0390)
Length of Stay		0.00728***
		(0.00131)
rho			-0.529
			-0.36
Constant	0.0716	-0.107
	(0.375)	(0.0871)
Observations	57,096	57,096	57,096
Standard errors in parentheses
*** p<0.01, ** p<0.05, * p<0.1
NOTE: All predictors at their mean value
LR test of indep. eqns. (rho = 0): chi2(1) = 1.50 Prob > chi2 = 0.2203
